1 Full title

2 **Blastula stage specification of avian neural crest**

3

4 Short Title:

5 **Ontogeny of avian neural crest**

6

7 Maneeshi S. Prasad<sup>1†</sup>, Eileen Uribe-Querol<sup>2†</sup>, Jonathan Marquez<sup>3</sup>, Stephanie Vadasz<sup>4</sup>,  
8 Nathan Yardley<sup>4</sup>, Patrick B. Shelar<sup>1</sup>, Rebekah M. Charney<sup>1</sup>, and Martin I. Garcia-Castro<sup>1\*</sup>

9

10 <sup>1</sup>School of Medicine Division of Biomedical Sciences, University of California, Riverside,  
11 USA; <sup>2</sup>División de Estudios de Posgrado e Investigación, Facultad de Odontología,  
12 Universidad Nacional Autónoma de México, Mexico City, Mexico; <sup>3</sup>Yale University, New  
13 Haven, CT, USA; <sup>4</sup>Ashfield, UDG Healthcare plc., Fort Washington, PA, USA.

14

15

16 \*corresponding author: [martin.garcia-castro@ucr.edu](mailto:martin.garcia-castro@ucr.edu)

17 †authors contributed equally

18

19 **Abstract**

20 Cell fate specification defines the earliest steps towards a distinct cell lineage. Neural  
21 crest, a multipotent stem cell population, is thought to be specified from the ectoderm, but  
22 its varied contributions defy canons of segregation potential and challenges its embryonic  
23 origin. Aiming to resolve this conflict, we have assayed the earliest specification of neural  
24 crest using blastula stage chick embryos. Specification assays on isolated chick epiblast  
25 explants identify an intermediate region specified towards the neural crest cell fate.  
26 Furthermore, low density culture suggests that the specification of intermediate cells  
27 towards the neural crest lineage is independent of contact mediated induction. Finally, we  
28 have validated the regional identity of the intermediate region towards the neural crest  
29 cell fate using fate map studies in blastula stage chick embryos. Our results suggest a  
30 model of neural crest specification at blastula stage, with restricted ectoderm and  
31 mesoderm capacities.

32

33

34

35

36

37

38

39

40

41

42

## 43 **Introduction**

44 Through the evolution of trilaminar, bilaterian embryos, a unique cell population arose in  
45 vertebrates termed the neural crest (NC). These cells contribute to the craniofacial  
46 skeleton and peripheral neurons and glia – key features of vertebrate lifestyle, and  
47 therefore NC are considered to be at the center of vertebrate evolution and diversity. NC  
48 is a transient, early embryonic multipotent stem cell population that defines vertebrates  
49 through its contribution to key features for the predatory lifestyle including a larger brain  
50 enclosure, jaws, and paired sense organs (Gans and Northcutt, 1983; Glenn Northcutt,  
51 2005; Le Douarin, 1980; Le Douarin and Kalcheim, 1999). Improper NC development  
52 leads to a host of pathologies known as neurocrestopathies (Bolande, 1996; 1974;  
53 Etchevers et al., 2006; Farlie et al., 2004). NC cells are thought to be derived from the  
54 ectoderm, which is consistent with their contribution to skin melanocytes and peripheral  
55 neurons and glia. However, their ectomesenchymal contributions in the head region –  
56 including bone, cartilage, and fat cells, which in other parts of the body are derived from  
57 the mesoderm – have been a topic of scientific focus and discourse. If NC cells are truly  
58 ectodermally derived, then their contribution to mesodermal-like derivatives suggests that  
59 they uniquely defy current assumptions of sequential segregation and restriction of  
60 potential. A break from the conceptual cannons of NC induction came in 2006, with the  
61 suggestion that NC specification is ongoing during gastrulation, and that it occurs  
62 independent from mesodermal or neural contributions (Basch et al., 2006). Accordingly,  
63 a pre-gastrula NC would not be subjected to the expected fate restrictions imposed on  
64 the three germ layers. Further support for pre-gastrula specification of the NC emerged

65 from other researchers (Patthey et al., 2008a; 2008b). In *Xenopus*, a specified region of  
66 NC was shown to exist coincident with the completion of gastrulation (Mancilla and Mayor,  
67 1996). Furthermore, mammalian work using rabbit embryos and a human model of NC  
68 formation based on embryonic stem cells (Betters et al., 2018; Leung et al., 2016), also  
69 suggest that early anterior NC is specified prior to gastrulation and independent from  
70 definitive neural and mesodermal tissues. In *Xenopus*, a specified region of NC was  
71 shown to exist coincident with the completion of gastrulation (Mancilla and Mayor, 1996);  
72 however, recent work suggests a pre-gastrula origin of NC, and proposed that prospective  
73 NC retain stemness markers and pluripotency from epiblast cells (Buitrago-Delgado et  
74 al., 2015). These finding highlight the need to understand the precise origins of neural  
75 crest cells.

76 Here, we report for the first time the earliest known specification of NC in chick blastula  
77 embryos. We have identified a restricted intermediate territory of the blastula epiblast as  
78 capable of generating NC when cultured in isolation under non-inductive conditions. This  
79 territory contains prospective NC (pNC) cells which develop independently from apparent  
80 mesoderm or neural contributions. Importantly, low density cell cultures of dissociated  
81 epiblast cells suggest that this early specification has been established prior to the culture  
82 of the cells, and that it can proceed in a cell autonomous and/or contact independent  
83 fashion. Additionally, the *in vivo* contribution of the intermediate epiblast territory to the  
84 neural crest lineage was validated using fate mapping. Our results suggest that the most  
85 anterior NC in amniotes arise from the pluripotent epiblast, prior and independent to  
86 definitive germ layer formation, which is in alignment with the multipotent character of NC.  
87

## 88 **Results**

### 89 **Restricted epiblast region at blastula stage is specified towards neural crest cell** 90 **fate**

91 To understand the ontogeny of the NC, we sought to investigate the earliest cell fate  
92 decisions that segregates the pNC cells from other cell fates. Previously, we reported on  
93 a specified population of NC in the chick gastrula (Basch et al., 2006). In this report, we  
94 asked whether NC cells are specified in blastula stage avian embryos, the stage  
95 preceding gastrulation and the appearance of the germ layers. Here, specification refers  
96 to an initiated path of differentiation towards a specific fate. While the specified cell does  
97 not initially express known markers of the tested fate (pre-migratory and migratory NC),  
98 they are able to do so after continuing with the specified program. The continuation of the  
99 specified program relies on permissive conditions, which if compromised, could prevent  
100 the originally specified fate.

101 Specification can be assessed by culturing isolated regions of the epiblast under a  
102 neutral, serum free and defined non-inductive environment. Using this assay, we  
103 analyzed whether chick epiblast explants from stage XII (Eyal-Giladi Staging (Eyal-Giladi  
104 and Kochav, 1976)) are specified towards NC cell fate. Accordingly, blastula embryos  
105 were collected and the underlying hypoblast layer removed. A horizontal strip from the  
106 equatorial plane  $\sim 250\mu\text{m}$  above the Koller sickle was then dissected and further cut into  
107 12 explants of  $\sim 80\text{-}100\mu\text{m}^2$  each (Fig. 1A). The explants were cultured in isolation in a  
108 collagen gel under non-inductive conditions (Basch et al., 2006) for 25h or 45h  
109 (corresponding to approximately stage HH4+ and HH8, respectively) and assessed for  
110 cell fate specification. In the chick, the expression of the transcription factor Pax7 has

111 been reported to begin at gastrula stage HH4+, where it is used as a key marker of early  
112 NC development (Basch et al., 2006). We observed that specifically intermediate  
113 explants, and not those taken from the most lateral or medial regions, display clear  
114 features of NC specification. Unlike explants from other regions, intermediate explants  
115 expressed nuclear Pax7 after 25h of culture, and acquire migratory characteristics with  
116 positive HNK1 epitope staining and maintained Pax7 expression after 45h of culture (n=5,  
117 Fig. 1A). To verify that migratory NC at 45h arise from the same Pax7-positive  
118 intermediate explants at 25h, we generated a series of explants in which each explant  
119 was bisected diagonally, and the resulting half fragments were cultured for either 25 or  
120 45h (Fig. 1B, n=10). Immunostaining on these explants indicate that the intermediate  
121 explants positive for Pax7 expression after 25h of culture are the same that display  
122 migrating NC cell marker (HNK1+) at 45h. To further confirm the nature of the proposed  
123 pNC specified at blastula stages, we assayed for the expression of additional NC markers  
124 in intermediate explants. We observed the expression of Sox9, Snai2, Msx1 and Tfap2a  
125 in the same intermediate explants (Fig. 1C). Taken together, these results suggest that a  
126 specific population of intermediate epiblast cells are specified in the blastula epiblast, prior  
127 to gastrulation, towards a NC cell fate.

128

129 **Intermediate region of epiblast is specified towards neural crest cell fate**  
130 **independent of neuroectodermal and mesodermal cell fates**

131 Previous work has reported on cell fate specification prior to gastrulation, including neural  
132 ectoderm, non-neural ectodermal and mesodermal cell fates (Hatada and Stern, 1994;  
133 Onjiko et al., 2015; Patthey et al., 2008b; 2008a; Pegoraro et al., 2015; Shin et al., 2011;

134 Trevers et al., 2018; Wilson et al., 2001). We therefore interrogated the relationship  
135 between pNC, neural, and mesodermal tissue in the blastula stage chick embryo.  
136 Specification of neuroectodermal (Sox2), mesodermal (TBXT), and NC (Pax7) fates were  
137 simultaneously assessed in restricted blastula stage epiblast regions using specification  
138 assays described in figure 1A. We observed Sox2 expression predominately in medial  
139 explants devoid of robust Pax7 signal (Fig. 2A). While on a few occasions both markers  
140 were found in the same explants, with lower levels of Pax7 expression. In the intermediate  
141 explants (#2), clear Pax7+/Sox2- expression was identified. Furthermore, only the lateral-  
142 most explants displayed TBXT expression, and these explants did not display definitive  
143 Pax7 signal (Fig. 2A). Furthermore, the expression of these genes was assessed  
144 quantitatively, using RT-qPCR, in the twelve explants after 25hrs of culture. As seen using  
145 the immunostaining in figure 2A, intermediate explants were identified with strong Pax7  
146 expression, minimal Sox2, and no TBXT (a lateral mesoderm marker) (Fig. 2B). Together  
147 this evidence strongly supports a distinct regional specification towards NC in the  
148 intermediate epiblast, with medial and lateral epiblast displaying neural and mesodermal  
149 specification, respectively.

150

### 151 **Low density culture of epiblast cells reveals neural crest cell specification at** 152 **blastula stage**

153 The regional specification of prospective NC in intermediate epiblast explants exposes  
154 clear heterogeneity of epiblast cells. This is also clear in the non-homogeneous  
155 expression of NC markers in the intermediate explants, and suggests that the  
156 intermediate explants are composed of cells of different identities. It seem therefore

157 possible that the identified specification could be the result contact mediated interactions  
158 between these cells. To address this possibility, we decided to assess specification in  
159 explants subjected to cell dissociation and plated at low density aiming to obtain  
160 sufficiently distant cells. The intermediate and medial regions of epiblast from EKG Stage  
161 X-XII blastula embryos, were dissociated into single cells using accutase, plated on a  
162 layer of collagen at very low density (10-20 cells/ cm<sup>2</sup>) and either fixed immediately (Time  
163 0), or cultured for 30h in neutral media without growth factors (Fig. 3A). These cultures  
164 were then evaluated for Pax7 and Sox9 expression via IF. As control, neural fold cells  
165 from HH Stage 6 embryo, were dissociated and plated in a similar manner, and processed  
166 for IF without culturing them. As expected cells from low density cultures of HH Stage 6  
167 display robust Pax7/Sox9 expression. No Pax7/Sox9 expression was observed in  
168 intermediate or medial low density cells at time 0 (right after plating). Instead, nearly 38%  
169 of the cells from low cell density cultures from the intermediate epiblast region expressed  
170 Pax7, and 24% expressed Sox9 (4 replicates), while cells from medial region contained  
171 only 8% Pax7 and 6% Sox9 positive cells (Fig. 3B). The low density dissociation  
172 experiment suggests that when cultured in isolation, a certain percentage of intermediate  
173 epiblast cells express NC markers in absence of cell-cell contact suggesting a potential  
174 cell autonomous specification of neural crest when cultured *in vitro* in absence of *in vivo*  
175 repressive cues. This experiment further suggests that a specification program has  
176 already been initiated within single cells of the heterogenous blastula epiblast.

177

178 **Intermediate epiblast cells contribute to neural crest lineage *in vivo***



179 The explant studies provide a clear and precise approach towards temporal and spatial  
180 identification of NC specification. However, to assess the contribution of the specified  
181 cells within the explants towards the NC lineage, *in vivo* analysis of the epiblast cells is  
182 required. We explored the *in vivo* contribution of the intermediate epiblast cells at stage  
183 XII embryos towards NC, using lineage tracing analysis with Dil and DiO, cultured the  
184 embryos from 16 to 36h (EC culture) (Chapman et al., 2001) and subsequently fixed and  
185 immunostained for Pax7. Labeled regions corresponding to the intermediate explants  
186 (Fig. 4B) contributed to the Pax7-expressing neural plate border (NPB) (Fig. 4C') and  
187 neural folds (Fig. 4C''), matching the expected location of NC cells (n= 8/11) (Fig. 4D''). In  
188 a few cases, targeted regions labeled simultaneously neural fold/NC along with  
189 mesoderm (n=1/11), neural (n=1/11), and non-neural ectoderm (n=3) (summarized in Fig.  
190 4A). In contrast, labeled medial cells contributed to the neural tube (n=3/3) (Fig. 4C').  
191 While mixed contributions were observed from few regions, most of the intermediate  
192 epiblast cells populated the NPB and neural folds expressing Pax7, lending *in vivo*  
193 support to the notion that at blastula stages the intermediate epiblast harbors pNC cells.  
194 Chi-squared test of observed NC contribution from the intermediate region compared to  
195 medial region revealed a statistically significant contribution of intermediate epiblast cells  
196 towards the NC lineage (p-value=0.024). These results are in agreement with previous  
197 lineage tracing studies (Hatada and Stern, 1994) during blastula stage of development.  
198 Taken together, our explant specification experiments and lineage tracing studies strongly  
199 suggest that cells in a restricted "intermediate" domain of the avian blastula epiblast are  
200 already poised to initiate the NC developmental program, well before and thus  
201 independently of, definitive mesoderm or neural contributions.

## 202 **Discussion**

203 According to the accepted sequential segregation of plasticity, pluripotent cells  
204 differentiate and give rise to the three germ layers, endoderm, mesoderm, and ectoderm,  
205 each with a distinct potential restricted in comparison to their progenitor. In turn, each of  
206 the germ layers differentiate into progenitors with progressively more restricted potential,  
207 ultimately generating the specific cell types that constitute the building blocks of the  
208 vertebrate body. A recognized exception is the primordial germ cell lineage, which arises  
209 independently from gastrulation (Magnusdottir and Surani, 2013; Saitou and Yamaji,  
210 2012). Classic models of NC formation suggest that NC arises from the ectoderm, and  
211 therefore, one would expect them to be devoid of mesoderm and endoderm associated  
212 potential. However, NC generated ectomesenchymal derivatives encompass ectoderm  
213 and mesoderm capacities, and thus represent a difficult paradigm. Efforts to resolve this  
214 issue include the suggestion that the NC constitute a fourth germ layer (Hall, 2018; 2000),  
215 and a recent model proposing that NC retains stemness markers and the same potential  
216 as pluripotent stem cells (Buitrago-Delgado et al., 2015). Our work presented in this report  
217 points to a model of blastula stage specification of NC as a segregated population of cells  
218 distinct from other cell fates.

219 We previously showed that anterior cranial neural crest specification is on-going during  
220 gastrulation, well before the overt expression of Pax7, the earliest restricted marker  
221 associated with NC in chick and rabbit embryos (Basch et al., 2006; Betters et al., 2018).  
222 This specification appears to be independent from either mesoderm or neural ectoderm  
223 (Basch et al., 2006). In this report, we expose the earliest known specification of anterior  
224 cranial NC in the chick blastula embryo. Using epiblast explants at high spatial resolution

225 we demonstrate NC specification in a restricted epiblast region. Furthermore, low density  
226 cultures of intermediate epiblast cells suggest NC specification is independent of cell-cell  
227 contact mediated inductive interactions in the absence of repressive cues experienced by  
228 these cells *in vivo*. However, the role of signaling mediated over long range between the  
229 single cells or within the microenvironment of individual single cells cannot be discounted  
230 and will require further evaluation during NC specification from epiblast cells. We also  
231 observed heterogeneity within the regionalized epiblast, as our single cells dissociation  
232 experiments revealed that 66% of the cells within the intermediate explants contributed  
233 to Pax7-positive NC cells. The heterogeneity of the early epiblast marked by a  
234 progressive loss of pluripotency has previously been documented in multiple species,  
235 including chick and human (Chen et al., 2018; De Paepe et al., 2014; Shi et al., 2015).  
236 We provide further *in vivo* support for NC specification using fate map studies, and  
237 validate that this intermediate epiblast region contains pNC cells that contribute to NC *in*  
238 *vivo*. Our study found contributions from several of our injections to mesoderm, neural  
239 ectoderm, and endoderm (with or without co-contribution to NC) which is in agreement  
240 with the broad allocation for those fates provided by Hatada and Stern seminal work  
241 (Hatada and Stern, 1994). Together, our results from explant, low density single cells and  
242 fate mapping very clearly suggest an early specification of prospective NC at blastula  
243 stage chick embryos. Importantly, we observe a distinct regional predisposition of epiblast  
244 cells to adopt neural, mesodermal or NC fates. While our results do not rule out the  
245 possibility of other ectodermal fates arising from the same region of epiblast, our assay  
246 clearly demonstrates the propensity of the blastomeres in the intermediate region to be  
247 uniquely specified towards NC cell fate. Such blastula stage specification of various cell

248 fates has been previously suggested. The pre-gastrula stage specification of  
249 neuroectoderm (Streit et al., 2000; Wilson et al., 2001) and non-neural ectoderm (Wilson  
250 et al., 2001) has been documented in chick embryos. These studies have suggested that  
251 medial epiblast territories are specified towards the neural cell fate, while the intermediate  
252 epiblast explants are fated towards neural plate border (Wilson et al., 2001) and NC  
253 (Trevers et al., 2018). Our work is in agreement with these findings and points towards  
254 the blastula stage specification of NC, neuroectoderm, and non-neural ectodermal cell  
255 fates in the chick embryo (Fig. 5). However, our model does not disregard the possibility  
256 of continued NC specification during later developmental stages that might be required  
257 for proper NC formation in the presence of multiple repressive cues from the other cells  
258 surrounding prospective NC region *in vivo*. This continuation of the NC program may be  
259 dependent upon definitive ectodermal and mesodermal contributions.

260 Given the blastula stage specification of NC, the early signaling contributions to  
261 specification needs to be addressed in future studies. It has been previously documented  
262 that at blastula stage in the lateral/intermediate regions of the epiblast, containing the  
263 pNC cells, Wnt/ $\beta$ -catenin is active and required for expression of NPB/NC markers  
264 (Wilson et al., 2001), suggesting a potential early role of Wnt/ $\beta$ -catenin signaling during  
265 NC specification. Additionally, further analysis of transcriptional changes leading to NC  
266 specification from epiblast cells will help in identifying the regulatory network involved  
267 during these early steps of NC induction. It is essential to assess this early NC regulatory  
268 network, especially under the light of new studies exposing a predisposition of  
269 blastomeres towards specific cell fate, based on the relative expression ratios of different  
270 lineage specifiers (Shi et al., 2015). To better understand the cell fate specification of

271 different lineages, positional single cell transcriptional analysis at blastula stage is needed  
272 to identify the network structure of individual cells to ascertain their predisposed cell fates.  
273 Based on our experiments in chick, we propose prospective NC cells as the earliest NC  
274 cell state specified during blastula stages from epiblast cells, prior to the formation and  
275 concomitant fate segregation associated with the three germ layers. It is believed that  
276 chick epiblast and human ES cells are primed, or more advanced than the naïve state  
277 (Mak et al., n.d.), and display differentiation bias towards certain cell fates (Mak et al.,  
278 n.d.; Shin et al., 2011), suggesting an early specification of cell fates prior to gastrulation  
279 in multiple species (Sheng, 2015). Our data from chick suggests a similar model for NC  
280 specification from epiblast cells prior to gastrulation. This model establishes a direct  
281 lineage between epiblast and NC, which are endowed with multipotent potential to form  
282 mesectodermal derivatives throughout the vertebrate body plan. Our model provides a  
283 parsimonious perspective underscoring the formation of this important vertebrate cell type  
284 in amniotes.  
285

286 **Materials & Methods:**

287 **Chicken embryos**

288 Fertile hen eggs were obtained from Hardy's Hatchery (Massachusetts, USA) and  
289 Sunstate Ranch (Sylmar, CA). Embryos were staged according to Hamburger and  
290 Hamilton (Hamburger and Hamilton, 1951) for stages 1 and over or Eyal-Giladi and  
291 Kochav (EGK) for preprimitive streak (prestalk) stages, Stage IX to XII. Embryos were  
292 cultured at 38°C in humidified incubator.

293 **Chick embryo explant culture**

294 The hypoblast of pre-streak embryos at stage XII was mechanically removed using glass  
295 needles, and a horizontal strip of epiblast tissue was cut from the center of the embryo.  
296 This strip was trimmed to include only the area pellucida and dissected into 12 equivalent-  
297 sized squares (each approximately 100µm<sup>2</sup>) and kept in PB1 buffer (5.97g/L NaCl, 0.2g/L  
298 KCl, 1.142g/L NaH<sub>2</sub>PO<sub>4</sub>, 0.19 g/L KH<sub>2</sub>PO<sub>4</sub>, 0.04 g/L Sodium Pyruvate, 1g/L Glucose,  
299 0.1g/L MgCl<sub>2</sub>-6 H<sub>2</sub>O, 0.14g/L CaCl<sub>2</sub>-2H<sub>2</sub>O, 0.06g/L Penicillin, 0.05g/L Streptomycin,  
300 0.01g/L Phenol Red, 4mg/L BSA (added just prior to use)) till next step. These squares  
301 were immobilized in separate collagen gels in four-well plates. Collagen gels were  
302 prepared by combining 90µl of 3.68 mg/ml collagen (BD Biosciences), 10µl of 10X DMEM  
303 (Gibco) and 3.7µl of 7.5% sodium hydrogen carbonate. Collagen gels were immersed in  
304 DMEM/F12 containing N2 supplement (Gibco) for 35-48 hours at 37°C. Explants were  
305 fixed in 4% paraformaldehyde for 15 minutes before immunostaining.

306 **Single cell dissociation experiment**

307 The hypoblast of pre-streak embryos at stage XII was mechanically removed using glass  
308 needles, and a horizontal strip of epiblast tissue was cut from the center of the embryo.

309 Horizontal epiblast strip was further dissected into 3 sections (2 intermediate and one  
310 medial) of ~150 cells each (Fig. 2A). The sections were collected in PB1 buffer and treated  
311 with accutase for 5min, rinsed in PB1 buffer and dissociated via pipetting. The dissociated  
312 cells were washed 2x in PB1 and then transferred in minimal PB1 onto collagen sheets  
313 in a chamber slide and was placed in incubator for 15min. Cell density after plating was  
314 around 10-20 cells per cm<sup>2</sup>. The chambers were then covered with neutral media  
315 (DMEM/F12 + N2 + Pen/Strep + 0.1%BSA) and placed back in the incubator for 30h. The  
316 chambers were washed with PBS and fixed in 4% paraformaldehyde for 30min before  
317 immunostaining. The number of cells obtained from each section after the complete  
318 dissociation and culture procedure were ~20 due to loss during dissociation and plating.

### 319 ***In vivo* lineage tracing**

320 At the pre-streak stage, Stage XII, embryos were injected with Dil and DiO (Molecular  
321 Probes) into cells of the lateral and medial region of the epiblast layer. Lateral region  
322 correspond to the explant #2-3 described above, while medial regions correspond to  
323 explant # 6-7. Embryos were cultured at 37°C for 25-48 hours in EC culture (Chapman et  
324 al., 2001), then fixed in 4% paraformaldehyde for 15 minutes before immunostaining.  
325 Embryos were mounted in gelatin and sectioned at 12µm using a Leica CM1900 Cryostat.  
326 Sections were mounted with Permafluor (Thermo Scientific). Images were acquired on  
327 Nikon Eclipse 80i microscope, and processed in Adobe Photoshop.

### 328 **Immunostaining for chick embryos and explants**

329 Immunostaining for chick embryos and explants were performed as previously described  
330 (Basch et al., 2006; Stuhlmiller and Garcia-Castro, 2011). Collagen gels containing  
331 explants were fixed with 4% paraformaldehyde for 10 minutes and then washed three

332 times with PBS. Gels were blocked with PBS containing 1% BSA and 0.1% Tween-20  
333 (PBST) for 1 hour at room temperature. Double or triple staining was performed. Primary  
334 antibodies for mouse IgG1 anti-Pax7 [1:50; Developmental Studies Hybridoma Bank  
335 (DSHB)]; mouse IgG1 anti-Msx1,2 (1:50; 4G1, DSHB), mouse IgG1 anti-Snail2 (1:100;  
336 62.1E6, DSHB), mouse IgG2b anti-AP2 (1:50; 3B5, DSHB), mouse IgM anti-HNK-1  
337 (1:100; 1C10, DSHB), goat IgG anti-Sox2 (1:100; R&D AF2018), goat IgG anti-Sox9  
338 (1:100; R&D AF3075) and rabbit IgG anti-Brachyury (1:10) were diluted in PBST and  
339 incubated at 4°C overnight. Primary antibody was washed 3 x 10 minutes with PBST.  
340 Gels were then incubated with secondary antibodies (goat anti-mouse IgG1 Alexa 568,  
341 1:2500; goat anti-mouse IgG2b Alexa 488, 1:2500; donkey anti-IgM Cy5, 1:500; donkey  
342 anti-goat IgG 488 or 633, 1:2500 and goat rabbit anti-IgG Alexa 488, 1:2500) diluted in  
343 PBST and incubated at 4°C overnight. Secondary antibody was washed 3 x 10 minutes  
344 with PT and then stained with DAPI (5µg/mL) for 5 minutes and washed again 3 x 10  
345 minutes with PBS before imaging. Primary antibodies used for chick immunostaining are  
346 listed in table 1.

#### 347 **Image processing for chick explants**

348 Images were taken using a Nikon Eclipse 80i microscope and processed in Adobe  
349 Photoshop CC version 14.2.1. Images of each experiment were taken in a fluorescent  
350 scope (Nikon) using the same settings for each fluorophore channel. Images were  
351 compiled in a Photoshop grid image and intensity levels were adjusted at the same time.  
352 The threshold levels were set using a positive reference when a clear nuclear staining  
353 was detected in an explant of the series.

#### 354 **Gene expression analysis**



355 For chick explant culture: After the treatment, explants were collected in a solution for  
356 RNA extraction using the provider specifications (Qiagen RNAeasy). Total RNA was  
357 collected in 14 $\mu$ l and was reverse transcribed using the iScript kit (Bio-Rad). Real time  
358 was performed in an iQ5 cycler (Bio-Rad) for 40 cycles using SYBRGreen. Three  
359 reference genes ( $\beta$ -actin, H2b and H4) were used in each experiment, and Pax7, Sox2,  
360 TbxT were the genes analyzed. The data analysis was performed using the  $\Delta\Delta$ CT  
361 formula, using as control the higher expression. Positive controls of neural plate and  
362 neural folds were used to compare the expression of Sox2 and Pax7, respectively.

### 363 **Statistical analysis**

364 Chi-Squared test for observed statistical significance for lineage tracing experiments in  
365 chick embryo were done using two-way Contingency table, with one-degree of freedom  
366 and represented as p-value significance for observed NC contribution of cells labelled  
367 within intermediate and medial epiblast regions.

**Table 1: Antibodies used for immunostaining**

| Antibody Name    | Vendor                    | Catalog | Dilution | Species/ Isotype | Used in Species |
|------------------|---------------------------|---------|----------|------------------|-----------------|
| MSX1/2           | DSHB                      | 4G1     | 1:50     | Mouse/IgG1       | Gallus gallus   |
| Snai2            | DSHB                      | 62.1E6  | 1:100    | Mouse/IgG1       | Gallus gallus   |
| Tfap2a           | DSHB                      | 3B5     | 1:50     | Mouse/IgG2b      | Gallus gallus   |
| SOX2             | R&D                       | AF2018  | 1:100    | Goat/IgG         | Gallus gallus   |
| SOX9             | R&D                       | AF3075  | 1:100    | Goat/IgG         | Gallus gallus   |
| HNK-1            | DSHB                      | 1C10    | 1:100    | Mouse/IgM        | Gallus gallus   |
| TbxT (Brachyury) | Gift from Dr Susan Mackem | NA      | 1:10     | Rabbit/IgG       | Gallus gallus   |

368

369 **Acknowledgements:** Imaging was performed at the UCR Microscopy and Imaging Core  
370 Facility and the UCR Stem Cell Core Facility (California Institute for Regenerative  
371 Medicine (CIRM) funded shared facility). We are grateful to Dr. Ken Cho (UC Irvine) and  
372 Dr. Ira Blitz (UC Irvine) for helpful conversations, suggestions and critical reading of the  
373 manuscript.

374  
375 **Funding:** This work was funded by NIH grant R01DE017914 to M.I.G-C.

376  
377  
378 **Competing interests:**

379 Authors declare no competing financial interest.

380  
381 **Data and materials availability:**

382 All data is available in the main text or the supplementary materials.

383

## 384 **References**

- 385 Basch, M.L., Bronner-Fraser, M., Garcia-Castro, M.I., 2006. Specification of the neural  
386 crest occurs during gastrulation and requires Pax7. *Nature* 441, 218–222.  
387 doi:10.1038/nature04684
- 388 Betters, E., Charney, R.M., García-Castro, M.I., 2018. Early specification and  
389 development of rabbit neural crest cells. *Developmental Biology*.  
390 doi:10.1016/j.ydbio.2018.06.012
- 391 Bolande, R. P., 1996. Neurocristopathy: Its Growth and Development in 20 Years.  
392 *PediatricPathology Labwatoly Medicine* 17, 1–25.
- 393 Bolande, R. P., 1974. The neurocristopathies: A unifying concept of disease arising in  
394 neural crest maldevelopment. *Human Pathology* 5, 409–429.
- 395 Buitrago-Delgado, E., Nordin, K., Rao, A., Geary, L., LaBonne, C., 2015. Shared  
396 regulatory programs suggest retention of blastula-stage potential in neural crest cells.  
397 *Science* 248, 1332–1335.

- 398 Chapman, S. C., Collignon, J., Schoenwolf, G. C. and Lumsden, A., 2001. Improved  
399 method for chick whole-embryo culture using a filter paper carrier. *Dev. Dyn.* 220,  
400 284–289.
- 401 Chen, Q., Shi, J., Tao, Y., Zernicka-Goetz, M., 2018. Tracing the origin of heterogeneity  
402 and symmetry breaking in the early mammalian embryo. *Nature Communications* 1–  
403 11. doi:10.1038/s41467-018-04155-2
- 404 De Paepe, C., Krivega, M., Cauffman, G., Geens, M., Van de Velde, H., 2014. Totipotency  
405 and lineage segregation in the human embryo. *MHR: Basic science of reproductive*  
406 *medicine* 20, 599–618. doi:10.1093/molehr/gau027
- 407 Etchevers, H.C., Amiel, J., Lyonnet, S., 2006. Molecular bases of human  
408 neurocristopathies. *Adv. Exp. Med. Biol.* 589, 213–234. doi:10.1007/978-0-387-  
409 46954-6\_14
- 410 Eyal-Giladi, H., Kochav, S., 1976. From cleavage to primitive streak formation: A  
411 complementary normal table and a new look at the first stages of the development of  
412 the chick. *Developmental Biology* 49, 329–337.
- 413 Farlie, P.G., McKeown, S.J., Newgreen, D.F., 2004. The neural crest: Basic biology and  
414 clinical relationships in the craniofacial and enteric nervous systems. *Birth Defect Res*  
415 *C* 72, 173–189. doi:10.1002/bdrc.20013
- 416 Gans, C., Northcutt, R.G., 1983. Neural Crest and the Origin of Vertebrates: A New Head.  
417 *Science* 220, 268–273. doi:10.1126/science.220.4594.268
- 418 Glenn Northcutt, R., 2005. The new head hypothesis revisited. *J. Exp. Zool.* 304B, 274–  
419 297. doi:10.1002/jez.b.21063
- 420 Hall, B.K., 2018. Germ layers, the neural crest and emergent organization in development  
421 and evolution. *genesis* 56, e23103–9. doi:10.1002/dvg.23103
- 422 Hall, B.K., 2000. The neural crest as a fourth germ layer and vertebrates as quadroblastic  
423 not triploblastic. *Evolution & Development* 2, 3–5. doi:10.1046/j.1525-  
424 142x.2000.00032.x
- 425 Hatada, Y., Stern, C.D., 1994. A fate map of the epiblast of the early chick embryo.  
426 *Development* 120, 2879–2889.
- 427 Le Douarin, N.M., 1980. The ontogeny of the neural crest in avian embryo chimaeras.  
428 *Nature* 286, 663–669.
- 429 Le Douarin, N.M., Kalcheim, C., 1999. *The Neural Crest*. Cambridge Univ. Press,  
430 Cambridge.
- 431 Leung, A.W., Murdoch, B., Salem, A.F., Prasad, M.S., Gomez, G.A., García-Castro, M.I.,  
432 2016. WNT/ $\beta$ -catenin signaling mediates human neural crest induction via a pre-  
433 neural border intermediate. *Development* 143, 398–410. doi:10.1242/dev.130849
- 434 Magnúsdóttir, E., Surani, M.A., 2013. How to make a primordial germ cell. *Development*  
435 141, 245–252. doi:10.1242/dev.098269

- 436 Mak, S.S., Alev, C., Nagai, H., Wrabel, A., elife, Y.M., 2015, n.d. Characterization of the  
437 finch embryo supports evolutionary conservation of the naive stage of development  
438 in amniotes. *cdn.elifesciences.org*. doi:10.7554/eLife.07178.001
- 439 Mancilla, A., Mayor, R., 1996. Neural Crest Formation in *Xenopus laevis*: Mechanisms  
440 of Xslug Induction. *Developmental Biology* 177, 580–589. doi:10.1006/dbio.1996.0187
- 441 Onjiko, R.M., Moody, S.A., Nemes, P., 2015. Single-cell mass spectrometry reveals small  
442 molecules that affect cell fates in the 16-cell embryo. *Proceedings of the National  
443 Academy of Sciences* 112, 6545–6550. doi:10.1073/pnas.1423682112
- 444 Patthey, C., Edlund, T., Gunhaga, L., 2008a. Wnt-regulated temporal control of BMP  
445 exposure directs the choice between neural plate border and epidermal fate.  
446 *Development* 136, 73–83. doi:10.1242/dev.025890
- 447 Patthey, C., Gunhaga, L., Edlund, T., 2008b. Early Development of the Central and  
448 Peripheral Nervous Systems Is Coordinated by Wnt and BMP Signals. *PLoS ONE* 3,  
449 e1625–10. doi:10.1371/journal.pone.0001625
- 450 Pegoraro, C., Figueiredo, A.L., Maczkowiak, F., Pouponnot, C., Eychène, A., Monsoro-  
451 Burq, A.H., 2015. PFKFB4 controls embryonic patterning via Akt signalling  
452 independently of glycolysis. *Nature Communications* 6, 5953.  
453 doi:10.1038/ncomms6953
- 454 Saitou, M., Yamaji, M., 2012. Primordial Germ Cells in Mice. *Cold Spring Harb Perspect  
455 Biol* 4, a008375–a008375. doi:10.1101/cshperspect.a008375
- 456 Sheng, G., 2015. Epiblast morphogenesis before gastrulation. *Developmental Biology*  
457 401, 17–24. doi:10.1016/j.ydbio.2014.10.003
- 458 Shi, J., Chen, Q., Li, X., Zheng, X., Zhang, Y., Qiao, J., Tang, F., Tao, Y., Zhou, Q., Duan,  
459 E., 2015. Dynamic transcriptional symmetry-breaking in pre-implantation mammalian  
460 embryo development revealed by single-cell RNA-seq. *Development* 142, 3468–  
461 3477. doi:10.1242/dev.123950
- 462 Shin, M., Alev, C., Wu, Y., Nagai, H., Sheng, G., 2011. Activin/TGF-beta signaling  
463 regulates Nanog expression in the epiblast during gastrulation. *Mechanisms of  
464 Development* 128, 268–278. doi:10.1016/j.mod.2011.03.001
- 465 Streit, A., Berliner, A.J., Papanayotou, C., Sirulnik, A., Stern, C.D., 2000. Initiation of  
466 neural induction by FGF signalling before gastrulation. *Nature* 406, 74–78.  
467 doi:10.1038/35017617
- 468 Stuhlmiller, T.J., Garcia-Castro, M.I., 2011. FGF/MAPK signaling is required in the  
469 gastrula epiblast for avian neural crest induction. *Development* 139, 289–300.  
470 doi:10.1242/dev.070276
- 471 Trevers, K.E., Prajapati, R.S., Hintze, M., Stower, M.J., Strobl, A.C., Tambalo, M.,  
472 Ranganathan, R., Moncaut, N., Khan, M.A.F., Stern, C.D., Streit, A., 2018. Neural  
473 induction by the node and placode induction by head mesoderm share an initial state  
474 resembling neural plate border and ES cells. *Proceedings of the National Academy  
475 of Sciences* 115, 355–360. doi:10.1073/pnas.1719674115

476 Wilson, S., Rydström, A., Trimborn, T., Willert, K., Nusse, R., Jessell, T.M., Edlund, T.,  
477 2001. The status of Wnt signalling regulates neural and epidermal fates in the chick  
478 embryo. *Nature* 411, 325–330. doi:10.1038/35077115  
479

## 480 **Figure legends**

481 **Fig. 1: Neural crest cells are specified at blastula stage in a restricted epiblast**  
482 **region.** (A) Schematic showing hypoblast-free epiblast explants ( $\approx 80\mu\text{m}$ ) from EGK  
483 Stage XII chick embryos generated from an equatorial stripe, immersed in collagen gels  
484 and cultured under defined non-inducing conditions in isolation. After 25h of culture,  
485 lateral explants displayed a robust Pax7<sup>+</sup> expression not seen in other explants (n=5).  
486 After 45h, a similar intermediate location displays Pax7<sup>+</sup>/HNK-1<sup>+</sup> and clear double  
487 positive migratory cells likely to be NCC (n=5; scale bar 100 $\mu\text{m}$ ). (B) Diagram of a  
488 bisection approach to monitor different conditions in original explants. Bisected explants  
489 from the same original region generate Pax7<sup>+</sup> expressing cells at 25h and migrating  
490 Pax7<sup>+</sup>/HNK-1<sup>+</sup> cells at 45h (n=10; scale bar 100 $\mu\text{m}$ ). (C) Images of intermediate explants  
491 with colocalization of neural crest markers at 45h (i) Pax7/Sox9, (ii) Snail2/AP2, (iii)  
492 Msx1/2/Sox9, (iv) Msx1/2/AP2, (v) Pax7/HNK-1 explant and (va) magnification of the  
493 migrating Pax7<sup>+</sup>/HNK-1<sup>+</sup> cells at 45h.

494 **Fig. 2: Intermediate region of epiblast is specified towards neural crest cell fate**  
495 **independent of neuroectodermal and mesodermal cell fates.** (A) Explants from EGK  
496 Stage XII chick embryos, collected after 25h and analyzed for expression of different cell  
497 fates; mesodermal (TBXT, (Brachyury) lateral-most), neural (Sox2, medial), and NC  
498 (Pax7, intermediate explant). (B) RT-qPCR analysis of twelve explants after 25h of  
499 culture, for the expression of Pax7, Sox2, and BraT (TbxT) (a lateral mesoderm marker).

500 Expression is represented as a normalized fold expression to the positive control region  
501 for each gene: neural fold (NF) for Pax7 expression and the neural plate for Sox2  
502 expression (not shown). Error bars are standard deviation between technical replicates.  
503 Out of the four individual sets of experiments each with 12 explants and controls, two  
504 representative RT-qPCR graphs are shown.

505

506 **Fig. 3: Low density isolated cell analysis of intermediate epiblast region identifies**  
507 **cell autonomous specification of neural crest in culture.** (A) Schematic showing HH  
508 stage 6 and EGK stage XII embryos used for low density isolated cell analysis and the  
509 workflow. Cells were dissociated from Stage 6 embryo marked by Pax7 expressing neural  
510 fold region (boxed sections within the red region) (positive control), plated, fixed and  
511 immunostained for Pax7/Sox9. Stage XII embryo explants marked as 1 (intermediate)  
512 and 2 (medial) regions were dissociated and cultured at very low density (10-20 cells/cm<sup>2</sup>)  
513 on a thin layer of collagen gel under non-inducing conditions for 30h. (B) Isolated cells in  
514 the low density culture were immunostained for Pax7/Sox9 expression from neural fold  
515 region, intermediate region (section 1) at time 0 (immediately after plating), intermediate  
516 region (section 1) used as no primary control, and from sections 1 and 2. Intermediate  
517 region (section 1) had the highest Pax7 positive cells (38%) with ~8% Pax7+ cells in  
518 medial region (n=4).

519

520 **Fig. 4: *In vivo* lineage tracing validates the contribution of intermediate epiblast**  
521 **region to neural crest lineage.** (A) Schematic summary identifying regions in the  
522 epiblast that contributed to NC (n=8) alone (4) or in combination with other fates (N-

523 neural, NC-neural crest, E-epidermal, M-mesodermal). Chi-Squared analysis identified  
524 statistically significant ( $p < 0.05$ ) NC contributions of the cells within the intermediate  
525 epiblast region. Embryo labeled with Dil/DiO at time 0 (B) and after 28h of culture at St.  
526 8 (C); sections demonstrating contribution to the CNS by cells in the middle of the embryo  
527 labeled with Dil (C', C'') and contribution to the lateral neural fold by cells in the  
528 intermediate epiblast labeled with DiO, colocalized with Pax7 expression or lateral to it  
529 (arrowhead and arrow respectively, C', C''). (D) Second embryo labelled with Dil on  
530 intermediate region of epiblast, demonstrating anterior neural fold localization of Dil (St.  
531 10). (D') and (D'') Neural tube cross-section at denoted anterior axial level with  
532 colocalization of Dil/Pax7 expression domains in migratory (arrowhead in (D')) and  
533 premigratory (arrowhead in (D'')) neural crest cells and some cells in neural epithelium.

534

535 **Fig. 5: Model of NC cell fate specification from the epiblast.** Beginning with early  
536 blastula, we propose a model of early NC cell fate specification from epiblast cells  
537 (depicted in orange color with underlying hypoblast layer in grey color). Based on our  
538 study, the model suggests specification of prospective NC (pNC) from the epiblast during  
539 blastula stages of embryonic development. The earlier specification of ectodermal and  
540 mesodermal fates suggested by various studies are also reflected in the model. pNE,  
541 prospective neural ectoderm; pNNE, prospective non-neural ectoderm; pM, prospective  
542 mesoderm; pE, prospective endoderm; PGC, primordial germ cells.



**Fig. 1: Neural crest cells are specified at blastula stage in a restricted epiblast region.**

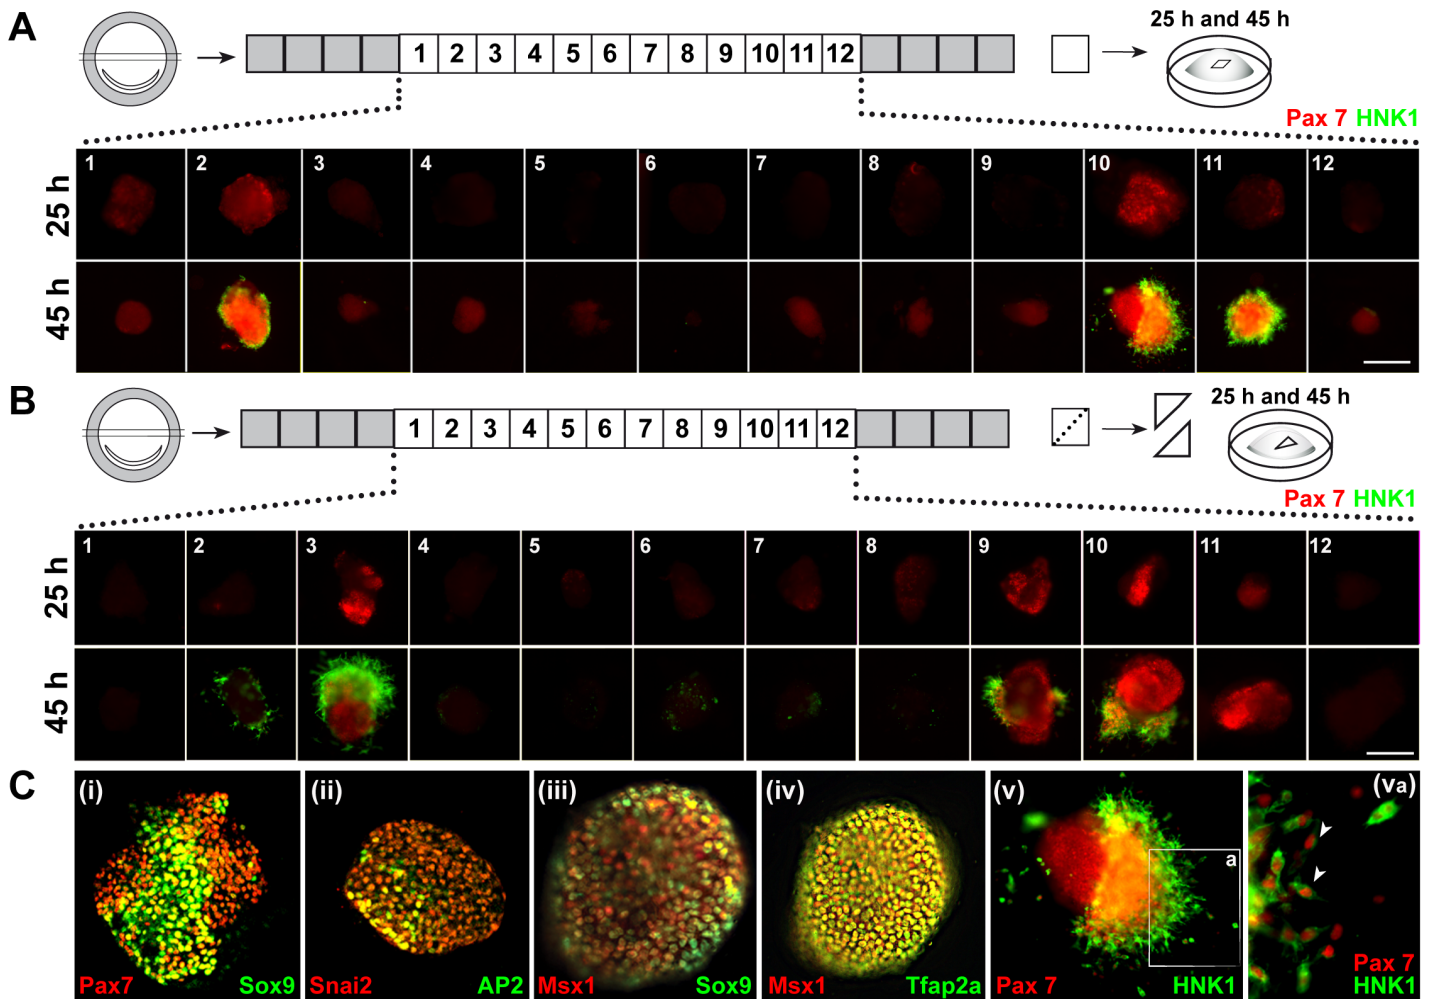



Fig. 2: Distinct regional predisposition of epiblast cells towards NC and other cell fates

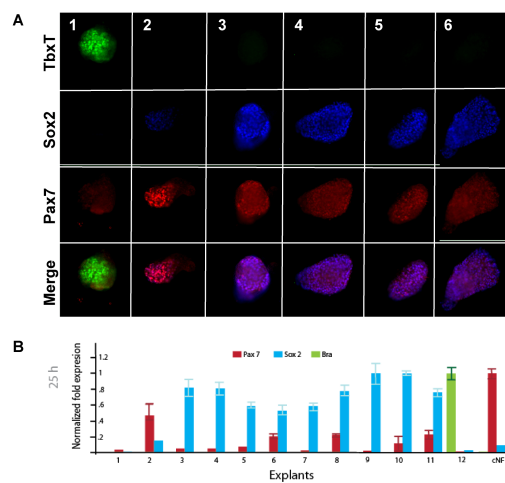

**Fig. 3: Low density culture of intermediate epiblast region identifies cell autonomous specification of neural crest.**

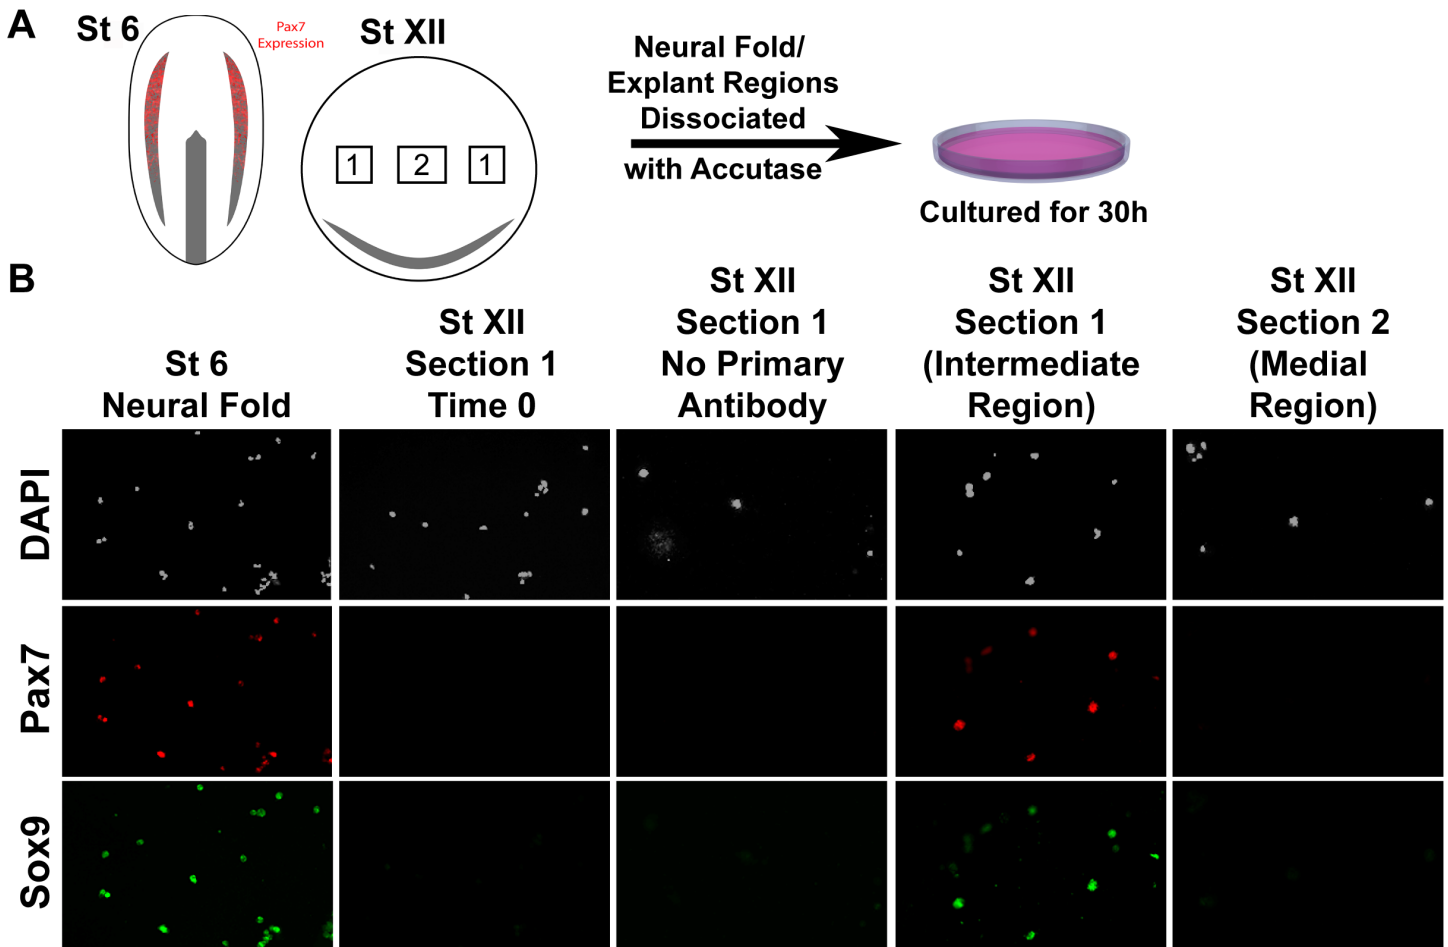

**Fig. 4: In vivo lineage tracing validates the contribution of intermediate epiblast region to neural crest lineage.**

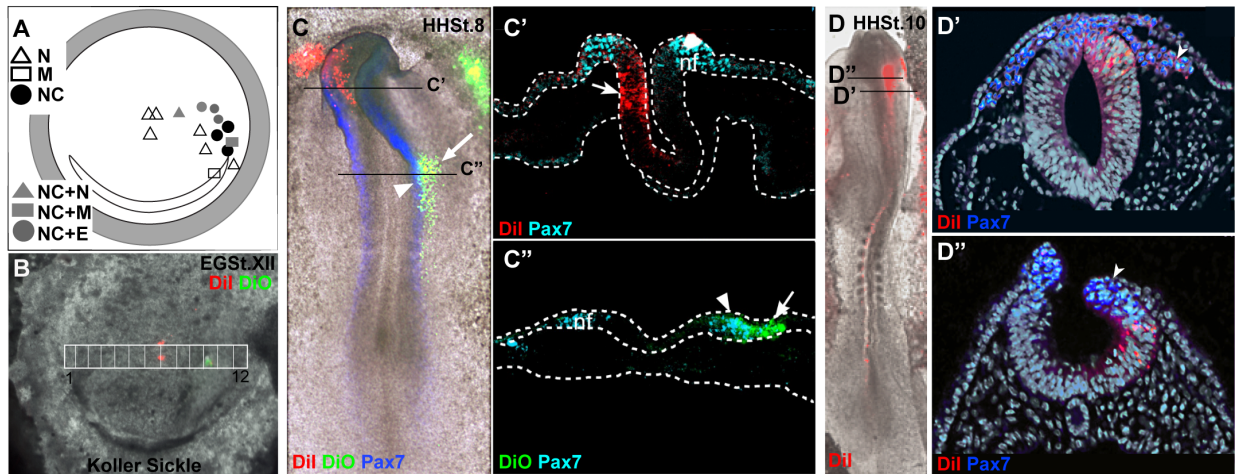

**Fig. 4: Model of NC cell fate specification from the epiblast.**

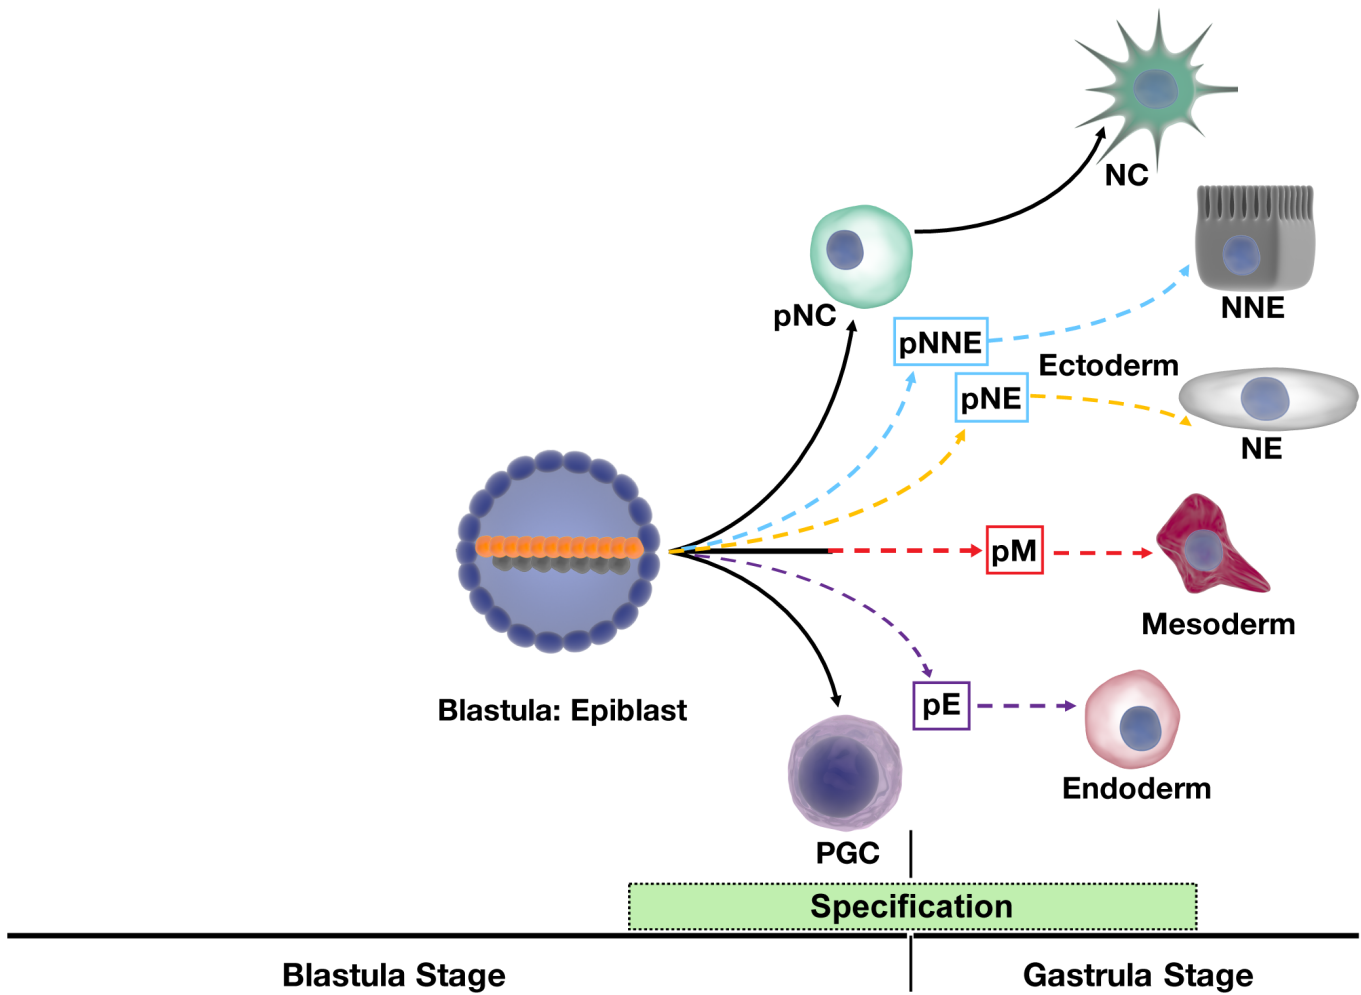

Source: https://www.biorxiv.org/content/10.1101/705731v1.full.pdf
